# Supplementary material for: Pan-Genome Analysis of Oral Bacterial Pathogens to Predict a Potential Novel Multi-Epitopes Vaccine Candidate
Source: MDPI journal article supplement (doi:10.3390/ijerph19148408), 2022-07-09
Supplement: s1 [file s1]

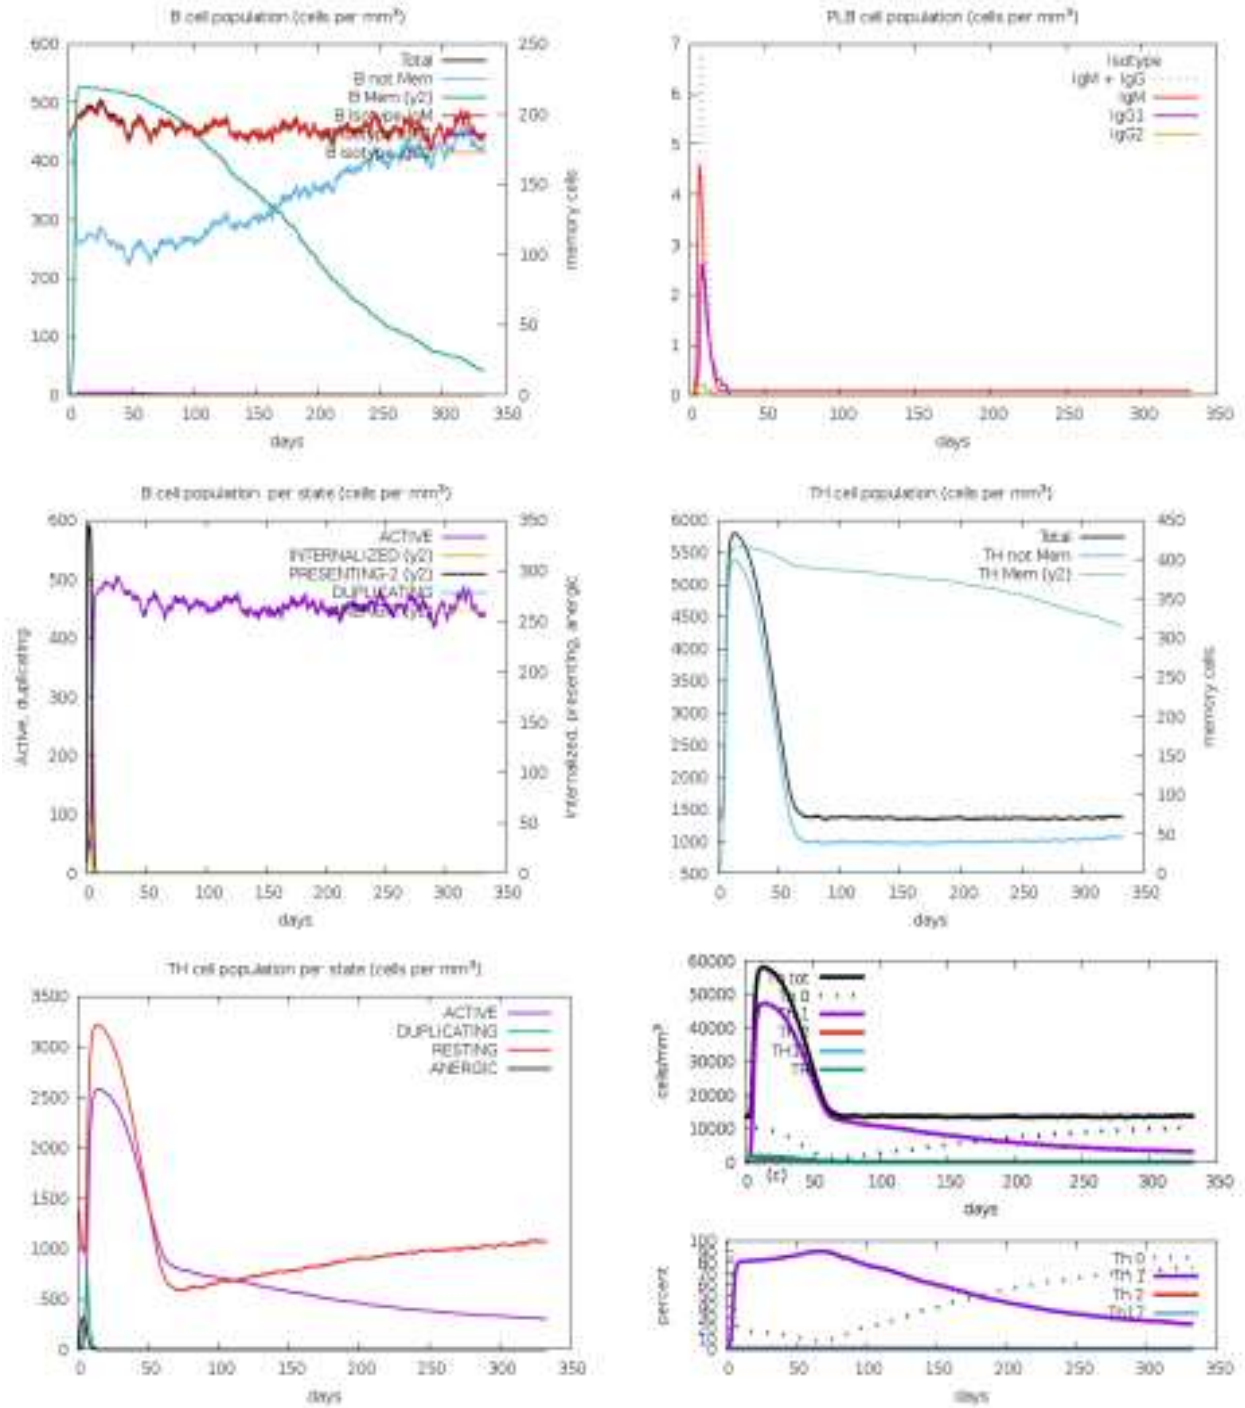

**Figure S1.** Different B-cell counts in response to the antigen. Legend: Act=active, Intern=internalized the Ag, Pres II = presenting on MHC II, Dup = in the mitotic cycle, Anergic = anergic, Resting = not active.

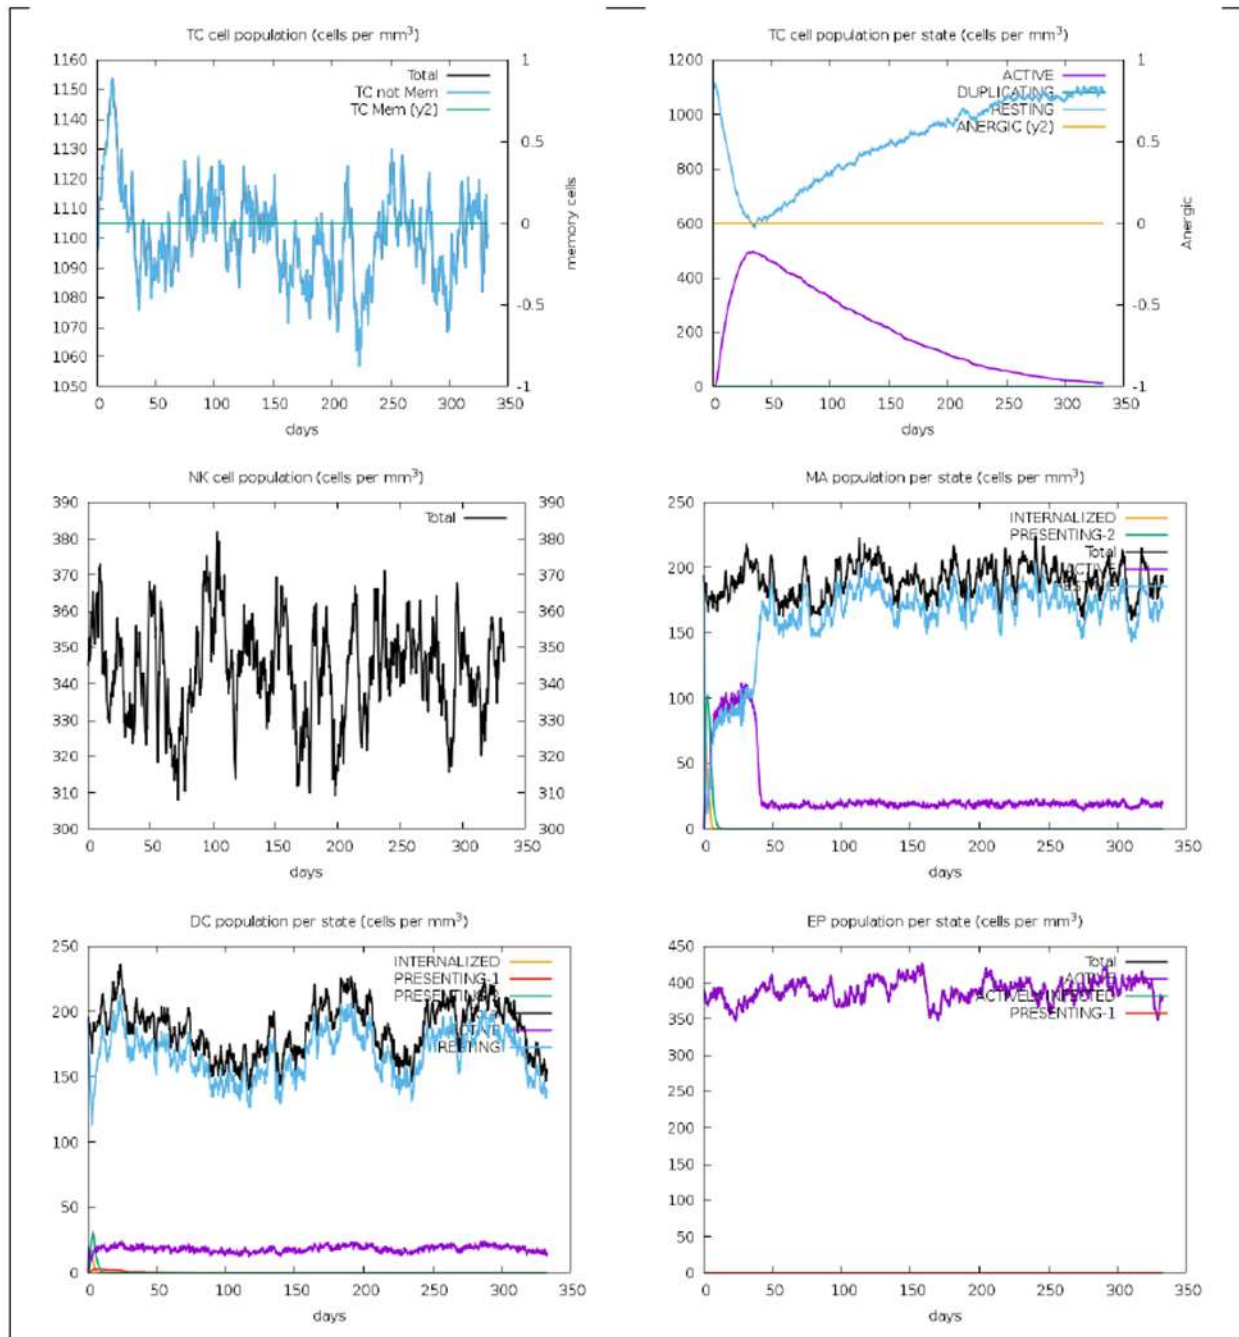

**Figure S2.** Different T-cell responses to the vaccine; cytotoxic killer T-cells (Tc), natural killer cells (NK), dendritic cells (DC), macrophages ( $M\phi$ ), and epithelial cells.

**Table S1.** Predicted B-cell epitopes for shortlisted vaccine targets.

| <b>B-CELL EPITOPES</b>                                                         | <b>PEPTIDES</b>                          |
|--------------------------------------------------------------------------------|------------------------------------------|
| >core/451/1/Org1_Gene734<br>(Lytic transglycosylase domain-containing protein) | IGRYTPADSTQELRDAARRLLPSSSLDKDLERLLRT     |
|                                                                                | WHKGYSTKTKRGERPCVNSDTGPYTSDSVYI          |
|                                                                                | SALPSAVPIQFNPAVKQCIKLYTEERRRLVRY         |
|                                                                                | GLTINSLVDERLD                            |
|                                                                                | IRMSGGKTDFWEIYPYLPRE                     |
|                                                                                | HIEHEICAGETGVPLATD                       |
|                                                                                | GVSNDELQLLNPQYKRGIIIPG                   |
|                                                                                | KKLDKVRDSLSPDLEASVSDFPEQGGQHSGGSGR<br>TA |
|                                                                                | KRANGLKSSSVKPG                           |
|                                                                                | KSSASGTKKKSKYSSKRKSR                     |
|                                                                                |                                          |
| >core/1384/1/Org1_Gene274<br>(superoxide dismutase protein)                    | FENADLNTI                                |
|                                                                                | FRPGKGGAPK                               |
|                                                                                | AIDKQFGSFEK                              |
|                                                                                | NAGNPVR                                  |
|                                                                                | LTYQNRAD                                 |
| >core/1029/1/Org1_Gene254<br>(FKBP-type peptidyl-propyl cis-trans isomerase)   | KNADTTAVSEKDSIALSMGILYGQDFANQFEMSRL      |
|                                                                                | QQQPIDSVAFLDGFKYGIDTTR                   |
|                                                                                | QLAHDSIDID                               |
|                                                                                | LKDTVSIAMKPADAQAFMQRIQAKKQRENNMKQF       |
|                                                                                | GQNIEKGNEYIDTFKKEDGVIVT                  |
|                                                                                | LQEGTGATPS                               |
|                                                                                | KEFDKNEEGIEFA                            |
|                                                                                | YGETGNYTIE                               |

**Table S2.** Prediction of MHC-I and MHC-II epitopes from B-Cell epitopes.

| <b>MHC-I</b> | <b>Percentile score</b> | <b>MHC-II</b>    | <b>Percentile score</b> |
|--------------|-------------------------|------------------|-------------------------|
| RTWHKGYSTK   | 0.02                    | ERLLRTWHKGYSTK   | 4.6                     |
| ERLLRTWHK    | 1.4                     |                  |                         |
| RLLPSSSLDK   | 0.01                    | AARRLLPSSSLDKDL  | 7.1                     |
| AARRLLPSS    | 0.91                    |                  |                         |
| KTKRGERPC    | 0.99                    | KTKRGERPCVNSDTG  | 62                      |
| RPCVNSDTG    | 11                      |                  |                         |
| TPADSTQEL    | 0.04                    | GRYTPADSTQELRDA  | 17                      |
| DSTQELRDA    | 11                      |                  |                         |
| GPYTSDSVY    | 0.04                    | NSDTGPGYTSDSVYI  | 23                      |
| NSDTGPGYTS   | 1.3                     |                  |                         |
| VPIQFNPAV    | 0.01                    | AVPIQFNPAVKQCIK  | 1.2                     |
| NPAVKQCIK    | 4.9                     |                  |                         |
| EERRRLVRY    | 0.09                    | IKLYTEERRRLVRY   | 5.1                     |
| IKLYTEERRR   | 3.2                     |                  |                         |
| LPSAVPIQF    | 0.01                    | SALPSAVPIQFNPA   | 9.8                     |
| SAVPIQFNPA   | 1.3                     |                  |                         |
| TINSLVDER    | 0.14                    | GLTINSLVDERLD    | 2.4                     |
| NSLVDERLD    | 25                      |                  |                         |
| KTDFWEIYPY   | 0.05                    | GKTDFWEIYPYLPR   | 0.15                    |
| FWEIYPYLPR   | 1.3                     |                  |                         |
| MSGGKTDFW    | 0.05                    | IRMSGGKTDFWEIYP  | 18                      |
| KTDFWEIYP    | 2.5                     |                  |                         |
| EICAGETGV    | 0.6                     | EICAGETGVPLATD   | 3.4                     |
| ETGVPLATD    | 12                      |                  |                         |
| EICAGETGV    | 0.6                     | HIEHEICAGETGVP   | 16                      |
| HIEHEICAGE   | 15                      |                  |                         |
| QLLNPQYKR    | 0.07                    | DELQLLNPQYKRG    | 1.2                     |
| LLNPQYKRG    | 3.2                     |                  |                         |
| DELQLLNPQY   | 0.12                    | GVSNDDELQLLNPQYK | 1.6                     |
| DELQLLNPQY   | 0.12                    |                  |                         |
| GVSNDDELQL   | 1.1                     | SPDLEASVSDFPEQ   | 1.3                     |
| DLEASVSDF    | 1.7                     |                  |                         |
| ASVSDFPEQ    | 8.9                     |                  |                         |
| KLDKVRDSLY   | 0.06                    |                  |                         |

|           |      |                |      |
|-----------|------|----------------|------|
| KVRDSLSPD | 6.5  | KKLDKVRDSLSPD  | 27.5 |
| GQHSGGSGR | 1.2  | EQGGQHSGGSGRTA | 17   |
| EQGGQHSGG | 22   |                |      |
| RANGLKSSS | 2.1  | KRANGLKSSSVKP  | 16   |
| GLKSSSVKP | 2.7  |                |      |
| KSKYSSKRK | 0.02 | GTKKKSKYSSKRK  | 5    |
| GTKKKSKYS | 0.85 |                |      |
| SSASGTKKK | 0.09 | KSSASGTKKKSKY  | 38   |
| SGTKKKSKY | 0.63 |                |      |
| AIDKQFGSF | 0.77 | AIDKQFGSFEK    | 9.5  |
| DKQFGSFEK | 6.3  |                |      |

**Table S3.** MHC alleles used for epitopes prediction.

| MHC class | MHC alleles                                                                                                                                                                                                                                                                                                                                                                                                                                                                                                                                                                                                                                                                                                                 |
|-----------|-----------------------------------------------------------------------------------------------------------------------------------------------------------------------------------------------------------------------------------------------------------------------------------------------------------------------------------------------------------------------------------------------------------------------------------------------------------------------------------------------------------------------------------------------------------------------------------------------------------------------------------------------------------------------------------------------------------------------------|
| MHC-I     | HLA-A*01:01, HLA-A*01:01, HLA-A*02:01, HLA-A*02:01, HLA-A*02:03, LA-A*02:03, HLA-A*02:06, HLA-A*02:06, HLA-A*03:01, HLA-A*03:01, HLA-A*11:01, HLA-A*11:01, HLA-A*23:01, HLA-A*23:01, HLA-A*24:02, HLA-A*24:02, HLA-A*26:01, HLA-A*26:01, HLA-A*30:01, HLA-A*30:01, HLA-A*30:02, HLA-A*30:02, HLA-A*31:01, HLA-A*31:01, HLA-A*32:01, HLA-A*32:01, HLA-A*33:01, HLA-A*33:01, HLA-A*68:01, HLA-A*68:01, HLA-A*68:02, HLA-A*68:02, HLA-B*07:02, HLA-B*07:02, HLA-B*08:01, HLA-B*08:01, HLA-B*15:01, HLA-B*15:01, HLA-B*35:01, HLA-B*35:01, HLA-B*40:01, HLA-B*40:01, HLA-B*44:02, HLA-B*44:02, HLA-B*44:03, HLA-B*44:03, HLA-B*51:01, HLA-B*51:01, HLA-B*53:01, HLA-B*53:01, HLA-B*57:01, HLA-B*57:01, HLA-B*58:01, HLA-B*58:01 |
| MHC-II    | HLA-DRB1*01:01, HLA-DRB1*03: *04:01, HLA-DRB101,HLA DRB1*04:05,HLADRB1*07:01,HLA,DQA1*03:01/DQB1*03:02,HLADQA1*03:01/DQB1*03:02,HLADQA1*01:02/DQB1*06:02,HLADPA1*02:01/DPB1*01:01,HLADPA1*01:03/DPB1*04:01,HLADPA1*03:01/DPB1*04:02,HLADPA1*02:01/DPB1*05:01,HLADPA1*02:01/DPB1*14:01.                                                                                                                                                                                                                                                                                                                                                                                                                                      |

**Table S4.** Top 20 docked solutions of vaccine for MHC-I.

| Solution No | Score | Area    | ACE    |
|-------------|-------|---------|--------|
| 1           | 22100 | 3365.60 | 492.88 |
| 2           | 20818 | 2820.00 | 452.38 |
| 3           | 19576 | 3631.70 | 90.02  |
| 4           | 19480 | 4355.10 | 166.44 |
| 5           | 19122 | 2969.20 | 257.95 |

|    |       |         |        |
|----|-------|---------|--------|
| 6  | 19014 | 2841.60 | 469.81 |
| 7  | 18986 | 4412.90 | 129.65 |
| 8  | 18426 | 4331.90 | 364.25 |
| 9  | 18352 | 3367.30 | -96.78 |
| 10 | 18346 | 3688.60 | 140.99 |
| 11 | 18224 | 4621.70 | -82.44 |
| 12 | 18140 | 2907.40 | 342.91 |
| 13 | 17802 | 3871.20 | 466.29 |
| 14 | 17798 | 3487.50 | 454.04 |
| 15 | 17786 | 3696.70 | 452.08 |
| 16 | 17780 | 3133.00 | 384.20 |
| 17 | 17754 | 2747.40 | 339.24 |
| 18 | 17742 | 2400.80 | 454.32 |
| 19 | 17698 | 3272.10 | 78.10  |
| 20 | 17694 | 2845.30 | 237.79 |

**Table S5.** Top 20 docked solutions of vaccine for MHC-II.

| <b>Solution No</b> | <b>Score</b> | <b>Area</b> | <b>ACE</b> |
|--------------------|--------------|-------------|------------|
| 1                  | 20106        | 2672.70     | 156.38     |
| 2                  | 19348        | 3410.90     | -104.98    |
| 3                  | 18640        | 3099.50     | 242.12     |
| 4                  | 18600        | 2883.70     | 201.18     |
| 5                  | 18332        | 2629.20     | 199.37     |
| 6                  | 18330        | 2639.00     | 296.24     |

|    |       |         |         |
|----|-------|---------|---------|
| 7  | 17936 | 2864.50 | 331.56  |
| 8  | 17574 | 2230.10 | -28.95  |
| 9  | 17458 | 2394.40 | 94.76   |
| 10 | 17436 | 2553.30 | 476.42  |
| 11 | 17422 | 2628.90 | 219.73  |
| 12 | 17354 | 2717.80 | -89.21  |
| 13 | 17076 | 2601.00 | 206.56  |
| 14 | 17002 | 2660.40 | 97.74   |
| 15 | 16870 | 2445.50 | 409.41  |
| 16 | 16844 | 2865.10 | -103.42 |
| 17 | 16684 | 2206.00 | 498.34  |
| 18 | 16518 | 3314.70 | 57.02   |
| 19 | 16482 | 2224.30 | -34.29  |
| 20 | 16454 | 2554.80 | 108.08  |

**Table S6.** Top 20 docked solutions of vaccine for TLR-4.

| <b>Solution No</b> | <b>Score</b> | <b>Area</b> | <b>ACE</b> |
|--------------------|--------------|-------------|------------|
| 1                  | 20450        | 3270.70     | 298.46     |
| 2                  | 20110        | 4387.00     | 496.92     |
| 3                  | 19500        | 2539.30     | 418.97     |
| 4                  | 19482        | 2689.80     | 347.35     |
| 5                  | 19412        | 3707.10     | 28.30      |



|    |       |         |        |
|----|-------|---------|--------|
| 6  | 19282 | 2802.80 | 123.49 |
| 7  | 19230 | 3481.30 | -24.85 |
| 8  | 19122 | 3374.10 | 451.65 |
| 9  | 19052 | 3650.40 | -63.35 |
| 10 | 18680 | 2473.20 | -44.07 |
| 11 | 18670 | 2805.30 | 315.13 |
| 12 | 18668 | 2788.40 | 20.75  |
| 13 | 18488 | 3260.50 | 395.06 |
| 14 | 18422 | 3248.50 | 297.29 |
| 15 | 18288 | 3141.90 | 453.78 |
| 16 | 18084 | 2685.50 | 249.18 |
| 17 | 17914 | 3004.40 | 199.07 |
| 18 | 17834 | 3064.90 | 417.93 |
| 19 | 17820 | 4090.10 | 270.23 |
| 20 | 17628 | 3504.90 | 219.68 |
